1 Title

2 Who cannot work from home? Characterizing occupations facing increased risk during the  
3 COVID-19 pandemic using 2018 BLS data

4 Marissa G. Baker

5 <sup>1</sup>Department of Environmental and Occupational Health Sciences, University of Washington,  
6 Seattle, WA, USA

7 \*Corresponding author

8 Email: [bakermg@uw.edu](mailto:bakermg@uw.edu) (MGB)

9 Abstract

10 Objectives. Not all workers are employed in occupations in which working from home is  
11 possible. These workers are at an increased risk for exposure to infectious disease during a  
12 pandemic event, and are more likely to experience events of job displacement and disruption  
13 during all types of public health emergencies. Here, I characterized which occupational sectors  
14 in the United States are most able to work from home during a public health emergency such as  
15 COVID-19.

16 Methods. 2018 national employment and wage data maintained by the U.S. Bureau of Labor  
17 Statistics (BLS) was merged with measures from the BLS O\*NET survey data. The measures  
18 utilized rank the importance of using a computer at work, and the importance of working with or  
19 performing for the public, which relate to the ability to complete work at home.

20 Results. About 25% (35.6 M) of the U.S. workforce are employed in occupations which could be  
21 done from home, primarily in sectors such as technology, computer, management,  
22 administrative, financial, and engineering. The remaining 75% of U.S. workers (including  
23 healthcare, manufacturing, retail and food services, et al.) are employed in occupations where  
24 working from home would be difficult.

25 Conclusions. The majority of U.S. workers are employed in occupations that cannot be done at  
26 home, putting 108.4 M U.S. workers at increased risk for adverse health outcomes related to  
27 working during a public health emergency. These workers tend to be lower paid than workers  
28 who can work from home. During COVID-19, this could result in a large increase in the burden  
29 of mental health disorders in the U.S., in addition to increased cases of COVID-19 due to  
30 workplace transmission. Public health guidance to “work from home” is not applicable to the  
31 majority of the U.S. workforce, emphasizing the need for additional guidance for workers during  
32 public health emergencies.

33

34

35

36

37

38

## 39 Introduction

40 Initial public health guidance for workers during the 2019-2020 COVID-19 pandemic  
41 was focused on ensuring workers stay home when sick, minimize non-essential travel,  
42 and practice good hygiene in order to slow the transmission of SARS-CoV-2 between  
43 workers and community members <sup>1</sup>. As the number of cases grew, workers were urged  
44 or required to work from home, <sup>2,3</sup> schooling was moved online <sup>4,5</sup>, retail establishments  
45 closed or severely reduced hours <sup>6,7</sup>, and food establishments closed or moved to a  
46 model of takeout and delivery only <sup>8,9</sup>. These measures, while necessary for halting the  
47 spread of a global pandemic, can have drastic effects on workers.

48 Exposure to infectious disease is often the primary consideration for worker health  
49 during a pandemic, particularly for front line workers such as those in healthcare.  
50 Previously, we calculated the number of workers in occupations where exposure to  
51 infection or disease occurs frequently using 2018 U.S. BLS occupational employment  
52 and O\*NET data <sup>10</sup>. We found that about 18% of the workforce is exposed to disease or  
53 infection at least once a month at work, putting these workers at an increased risk of not  
54 only contracting a disease due to work, but also transmitting an infectious disease into  
55 the community.

56 While exposure to infectious disease is an important occupational health concern during  
57 a pandemic, exposure to job insecurity (that is, concern about having a job in the future)  
58 is another important metric of worker health to consider. Several researchers have  
59 shown a relationship between exposure to acute and chronic job insecurity and  
60 measures of adverse physical and mental health outcomes including depression, stress,  
61 and physiologic markers such as increased blood pressure <sup>11-13</sup>. Exposure to a job  
62 displacement event, due to voluntary or involuntary job loss stemming from a layoff,  
63 downsizing, or plant closure, also has been shown to be related to a variety of adverse  
64 mental health outcomes including depression, suicide, and stress <sup>14-16</sup>, negative  
65 changes in diet <sup>17,18</sup>, and physical health outcomes such as coronary heart disease and  
66 other physiologic markers of adverse health <sup>19,20</sup>. After exposure to a job displacement  
67 event, workers may take jobs of lower quality, resulting in long-term economic and  
68 psychological effects for once-displaced workers <sup>21</sup>. With many workers in the U.S.

69 receiving healthcare and other benefits from their work arrangement, a layoff or  
70 reduction in hours can affect access to healthcare or long term stability for these  
71 workers <sup>22</sup>.

72 Working from home can allow continued productivity when access to a workplace is  
73 restricted, such as during the COVID-19 pandemic. However, it is known that not all  
74 workers are able to work from home due to differences in job tasks. Jobs that lend  
75 themselves to being completed at home are jobs that require limited interaction with the  
76 public, so the work can be done without relying on others. Jobs that primarily use a  
77 computer to complete tasks also lend themselves to being done at home, given the  
78 portability of work on laptop computers.

79 When access to a workplace is restricted due to a public health emergency, the workers  
80 who cannot work from home are likely to experience job disruption, hours reduction, or  
81 voluntary or involuntary layoff. During COVID-19, this was exhibited fairly early, with  
82 joblessness claims in the U.S. hitting record highs, especially in occupations such as  
83 food service, retail, hospitality, and manufacturing <sup>23</sup>. Further, workers who are essential  
84 personnel and continue going to workplaces (e.g. healthcare workers, grocery store  
85 workers, bus drivers) risk increased exposure to disease, and potential increases in job  
86 stress due to changes in job practices and duties to meet an increase in demand for  
87 services. The experiences of workers who cannot work from home will be different  
88 between occupations, informed by whether or not the work is essential, what workplace  
89 and regulatory protections exist for the occupation, the pay and benefits they receive,  
90 whether they have union protections, and how likely their industry is to return to normal  
91 operations after the pandemic event.

92 Here, I characterized which, and how many, United States workers perform job tasks  
93 that can be done at home, using metrics characterizing the importance of interacting  
94 with the public at work, and importance of computer use at work, and which groups of  
95 occupations are likely not able to work from home, putting them at risk for exposure to  
96 infectious disease at work, job displacement, disruption, or insecurity during this time.  
97 Additionally, I investigated how median annual wages differ between occupations that

98 can and likely cannot work from home during a pandemic event, to better understand  
99 which workers may be most vulnerable to work disruptions during a pandemic event.

## 100 Methods

101 This analysis utilized measures from two existing data sources, as previously detailed in  
102 Baker et al.<sup>10</sup> and Doubleday et al.<sup>24</sup>. Briefly, U.S. employment and median annual  
103 wage by occupation, was downloaded from the U.S. BLS Occupational Employment  
104 Statistics database<sup>25</sup>. These data were last updated in May 2018, and give a count of  
105 the number of U.S. workers employed in each 2010 Standard Occupational  
106 Classification code (2010 SOC) and the national median annual wage for each SOC.  
107 Guidance around SOC codes is detailed elsewhere<sup>26</sup> but briefly, SOC codes range  
108 from two digits (Major Group Code) to six digits (Detailed Occupation Code) and are  
109 hierarchical in nature. For example, SOC 35-0000 denotes “Food Preparation and Serving  
110 Related Occupations”, with SOC 35-9021 denoting the specific food preparation  
111 occupation of “Dishwasher.” For this analysis, six-digit occupation codes were utilized,  
112 and then aggregated over larger occupational groupings (i.e. two-digit codes).

113 To estimate the number of workers in occupations that could be done at home, the  
114 O\*NET database was utilized. O\*NET is a survey overseen by BLS that asks  
115 employees, employers, and job experts across six-digit SOC codes about exposures  
116 encountered at work, knowledge and skills utilized in the occupation, types of tasks  
117 performed, and workplace characteristics<sup>27</sup>. O\*NET does not collect data from military  
118 occupations; thus, SOC codes beginning with 55 “Military Specific Occupations” are not  
119 included in O\*NET data. Similarly, employment numbers for “Military Specific  
120 Occupations” is not reported in the BLS Occupational Employment Statistics Database.  
121 All other SOC codes are included in the O\*NET database, with updates made every  
122 year to ensure the database is completely refreshed every few years<sup>28</sup>. Over a ten-year  
123 period (2001 to 2011) over 150,000 employees and job experts representing 125,000  
124 workplaces had responded to the O\*NET questionnaire, making it a robust source of  
125 occupational information<sup>29</sup>.

126 Two O\*NET measures were utilized in this analysis. The first characterized the  
127 importance of computer use at work via the question, “How important is working with  
128 computers to the performance of your current job?”. The second O\*NET measure  
129 utilized was, “How important is performing for or working directly with the public to the  
130 performance of your current job?” For both questions, respondents could select from:  
131 Not Important, Somewhat Important, Important, Very Important, Extremely Important.  
132 Answers were converted to a 0-100 score, representing weighted-average score for  
133 each SOC code. A score of 50 is equivalent to a respondent answering “Important”.

134 Importance scores for both O\*NET metrics were merged by six-digit SOC code with the  
135 national employment and annual median wage data. Annual median wage was used as  
136 opposed to annual mean wage in order to minimize effects from extreme values. Both  
137 O\*NET measures were plotted against each other, with the resultant scatterplot divided  
138 into four quadrants. Each SOC on the scatterplot was weighted by annual median  
139 wage, to visualize differences in income between the four quadrants.

140 To further explore relationships in these data, the distribution of median annual wages  
141 was compared between quadrants using a Kruskal-Wallis test.

142 All data analysis was conducted using the statistical software package R version 3.6.3.

143

## 144 Results

145 BLS reported a total of 144.7 million persons employed in the United States in May  
146 2018; this does not include workers in military occupations. Figure 1 shows the  
147 relationship between “Importance of computer use at work” and “Importance of  
148 interaction with or performing for the public at work” for all 6-digit SOC codes. Each  
149 SOC plotted here is sized in proportion to the national median annual wage reported for  
150 that occupation by BLS, with larger points denoting a higher median annual wage. Each  
151 SOC on the plot is color-coded broadly by occupational sector.

152 Figure 1 is divided into four numbered quadrants. SOCs in quadrant 1 represent those  
153 occupations that could likely be completed at home, that is, computer use is important

154 to the work, but interaction with the public is not important. As detailed in Table 1, this  
155 quadrant represents 24.6% (35.6 M) of the BLS workforce and primarily includes  
156 occupational sectors such as business and finance, computer and mathematical,  
157 architecture and engineering, and the sciences, as shown in Table 2.

158 The remaining three quadrants in Figure 1 represent occupations that likely cannot be  
159 done from home, making them susceptible to not only infectious disease exposure at  
160 work, but also to job disruption, job insecurity, and potential job displacement if their  
161 workplace closes. Quadrant 4 represents occupations where computer work is not  
162 important, and interaction with the public is very important. As detailed in Table 1, this  
163 quadrant represents 18.9% of the BLS workforce (27.4 M workers) and as shown on  
164 Table 2, consists of occupational sectors such as retail, food service, beauty services  
165 (e.g. barbers, hairdressers, manicurists), some protective services (e.g. security guards,  
166 TSA agents), and transportation operators such as bus drivers or subway operators.

167 Quadrant 2 represents occupations where both interaction with the public and computer  
168 use are important, and accounts for 36.4% (52.7 M) of the BLS workforce. These  
169 workers are in management, healthcare, legal, and education sectors. Quadrant 3  
170 represents occupations where both interaction with the public and computer use are not  
171 important, accounting for 20.1% (29.0 M) of the BLS workforce. These are typically  
172 workers in construction, maintenance, production, and natural resources.

173 Table 1 summarizes the distribution of median annual wages across each quadrant. A  
174 Kruskal-Wallis one way analysis of variance test indicated that the median annual wage  
175 between these quadrants were significantly different. The quadrant with the highest  
176 annual median wage was quadrant 1, workers who could likely work from home, with a  
177 median annual wage of \$62,710. The lowest annual median wage was in quadrant 4,  
178 which was \$32,040. This over \$30,000 difference is statistically significant when  
179 applying a Wilcoxon Rank-Sum test ( $p < 0.0001$ ).

180 Table 2 details total employment and median annual wage by 2-digit SOC, and the  
181 percentage of workers in each 2-digit SOC code that fall into each of the four quadrants.

182

## 183 Discussion

184 During the COVID-19 pandemic, U.S. workers were urged or required to work from  
185 home help halt disease transmission. However, only about a quarter of U.S. workers are  
186 in occupations that can be done at home, with about 75% of the U.S. workforce  
187 (represented in Quadrants 2-4 on Figure 1) either remaining in the workplace and  
188 risking increased exposure to infectious disease, or experiencing job insecurity,  
189 disruption, and displacement due to workplace closure. The occupations that can be  
190 done at home have, on average, higher median wages than occupations that cannot be  
191 done at home, further increasing the vulnerabilities between these two groups.

192 Differences in exposure and experiences for these three quadrants that cannot work  
193 from home must be noted. Those workers in quadrant 2 are workers in jobs where  
194 interaction with both the public and computers are important. Many of these workers are  
195 in essential services, such as healthcare and education, making them less likely to be  
196 displaced from work, but still experience work disruptions due working different hours,  
197 performing different tasks, or working in a new modality. The workers that continue to  
198 go to work will also face increased exposure to disease. Like the workers in quadrant 1,  
199 these workers tend to have wages above the national median, and likely increased  
200 access to benefits and job protections through union and workplace protections.

201 Those in quadrant 3 are largely in construction, maintenance, natural resources, and  
202 manufacturing. Many of these workers are in jobs that may not be considered to be  
203 essential services<sup>30</sup> making them susceptible to job displacement or hours reductions if  
204 a shelter-in-place is ordered. If workplaces are open, workers may work in close  
205 proximity to other workers on jobsites, increasing risk of exposure to disease. Despite  
206 lower than median wages, many of these workers may have some protections from their  
207 union in addition to other regulatory protections, and increased certainty of a return to  
208 work when public health orders are lifted, given the vital nature of their work.

209 The workers in quadrant 4 are those workers for which using a computer is not  
210 important, but interacting with the public is. These workers, largely in food services,  
211 some protective services, personal care, and transportation could face job displacement  
212 and job insecurity as nonessential business are asked to close for public health

213 reasons, and the public avoids nonessential activities. Those working in grocery stores  
214 and other essential retail be less likely to face job displacement during a public health  
215 emergency as their workplaces will remain open. However, if schools close, essential  
216 workers that cannot work from home may have to choose between quitting their job or  
217 reducing their hours in order to stay home with children, or going into work without  
218 adequate back-up care for their children, further contributing to a feeling of insecure  
219 employment and stress. Importantly, these workers are also at increased risk of  
220 exposure to SARS-CoV-2, and may have to choose between continuing to work and  
221 risking exposure, or quitting with no safety net, which could be a particularly challenging  
222 decision for a worker in a high-risk group (e.g. older, pregnant, immunocompromised).

223 Other data sources have quantified the number of U.S. workers that work from home,  
224 including the American Time Use Survey, U.S. Census American Community Study,  
225 and the National Compensation Survey. However, these data sources do not quantify  
226 how many and which types of workers have work that feasibly can be done at home  
227 when workers are ordered to do so. The National Compensation Survey characterizes  
228 how many workers have access to a remote working benefit as part of a compensation  
229 package, regardless of whether a respondent took advantage of it <sup>31</sup>, and The American  
230 Time Use Survey and the American Community Study characterize whether a worker  
231 worked from home on the day the survey was administered, regardless of whether it  
232 was paid work or not <sup>32,33</sup>. The work presented here quantified the number and types of  
233 workers who could work from if it was ordered in an emergency, which is an important  
234 distinction from the above-mentioned data sources.

235 The COVID-19 pandemic, and other public health emergencies and disasters, tend to  
236 exacerbate existing disparities in society, which was also shown in this analysis. Here, I  
237 showed that the distribution of median annual wages differed between those workers  
238 that would likely be able to work from home, and those workers that would likely not be  
239 able to work from home, further adding to the vulnerability of lower-income workers  
240 during the COVID-19 pandemic. Workers who are able to work from home will have  
241 some continuity in pay, increased ability to care for a child out of school, decreased risk  
242 of being laid off or having hours substantially cut, and decreased potential exposure to



243 disease or infection via other workers or community members. This further exemplifies  
244 the importance of work as a social determinant of health, and highlights the importance  
245 of understanding which workers are in more vulnerable jobs during an emergency or  
246 disaster, and the risks and challenges these groups face<sup>34</sup>.

247 Limitations related to the data used here must be acknowledged. BLS data does not  
248 count self-employed (which includes a variety of workers ranging from gig economy  
249 workers to highly trained independent consultants, for example), undocumented,  
250 contingent, military, and domestic workers. This undercoverage of the working  
251 population in the BLS survey could affect conclusions presented here. O\*NET relies on  
252 employee and employer self-report, so is subject to inherent bias and misclassification  
253 during collection. Further, data collected by O\*NET is aggregated on the occupational  
254 level, and I further aggregated data into quadrants, meaning that within-occupation and  
255 within-quadrant variation isn't accounted for in this analysis.<sup>35</sup> This will lead to  
256 misclassification both within the occupations, and within each quadrant. The O\*NET  
257 metrics used in this analysis were measures of the importance of using a computer for  
258 work and importance of interacting with the public, which differs from the frequency of  
259 using a computer or frequency of interacting with the public. Therefore, some jobs for  
260 which computer use is rated as very important, may not actually require use of a  
261 computer very frequently, and jobs where interaction with the public is rated as  
262 important may not actually interact with the public frequently. This further lead to  
263 misclassification in the analysis for who could work from home most easily.

264

## 265 Public Health Implications

266 Understanding the unique challenges that workers who cannot work from home could  
267 face during a pandemic or other public health emergency can help to inform appropriate  
268 risk management and policy-based strategies for these workers, to ensure that their  
269 livelihood can continue. This work shows that only about 25% of the United States  
270 workforce are in jobs that could continue to be done at home during a pandemic event.  
271 These workers would be protected from disease exposure due to working from home,  
272 and are typically higher paid jobs with more workplace protections, further protecting

273 these workers from adverse health effects related to job insecurity, job stress, and job  
274 displacement.

275 The rest of the workforce (about 75% across quadrants 2-4 in Figure 1) are in  
276 occupations that would face increased exposure to disease and infection if they are still  
277 working out of their workplaces, and increased exposure to psychosocial factors such  
278 as job displacement, disruption, and insecurity if they are not able to work out of their  
279 workplaces. These workers could also face stress and job insecurity as they may have  
280 to choose between going to work and being exposed, and staying home to protect  
281 themselves or care for a family member.

282 Experiences and outcomes for these workers during a pandemic event would likely be  
283 modified by workplace characteristics, such as available workplace controls, workplace  
284 policies and benefits, whether or not workers are unionized, whether or not workers  
285 qualify for state or federal unemployment protections, worker pay, and the probability of  
286 returning to work once normal operations resume.

287 In this analysis, I found that the workers with the lowest average median wage are  
288 workers that are not able to work from home, and include occupational groups such as  
289 food services, retail, personal care, and some transportation workers. Workers in this  
290 quadrant have an average annual median wage about \$30,000 less than the workers  
291 who can work from home, and these workers often lack protections such as employer-  
292 provided healthcare, appropriate sick leave, or paid time off, further increasing their  
293 vulnerability during a public health emergency, and enforcing the role of work as a  
294 social determinant of health.

295 While all workers will be disrupted during a pandemic event such as COVID-19,  
296 increased public health focus should be on those that are the most vulnerable, including  
297 ensuring these workers are adequately protected at work, and have social protections in  
298 the event they no longer are able to work. This will ensure these workers do not bear an  
299 undue health burden during a public health emergency, and also help to reduce the  
300 burden of adverse health outcomes that could emerge in these workers who cannot  
301 work from home during a pandemic event.



303 **References**

- 304 1. Centers for Disease Control and Prevention (CDC). Interim Guidance for  
305 Businesses and Employers to Plan and Respond to Coronavirus Disease 2019  
306 (COVID-19). [https://www.cdc.gov/coronavirus/2019-ncov/specific-](https://www.cdc.gov/coronavirus/2019-ncov/specific-groups/guidance-business-response.html)  
307 [groups/guidance-business-response.html](https://www.cdc.gov/coronavirus/2019-ncov/specific-groups/guidance-business-response.html). Published 2019. Accessed February  
308 26, 2020.
- 309 2. Frenkel S. The Week in Tech: Welcome to the Age of Mandatory  
310 Videoconferencing. *New York Times*.  
311 [https://www.nytimes.com/2020/03/06/technology/coronavirus-tech-](https://www.nytimes.com/2020/03/06/technology/coronavirus-tech-businesses.html)  
312 [businesses.html](https://www.nytimes.com/2020/03/06/technology/coronavirus-tech-businesses.html). Published March 6, 2020.
- 313 3. Weise K. Ahead of the Pack, How Microsoft Told Workers to Stay Home. *New*  
314 *York Times*. [https://www.nytimes.com/2020/03/15/technology/microsoft-](https://www.nytimes.com/2020/03/15/technology/microsoft-coronavirus-response.html)  
315 [coronavirus-response.html](https://www.nytimes.com/2020/03/15/technology/microsoft-coronavirus-response.html). Published March 15, 2020.
- 316 4. Samuel H, Walsh J. Growing number of European countries shut schools to curb  
317 spread of coronavirus. *The Telegraph*.  
318 [https://www.telegraph.co.uk/news/2020/03/12/ireland-closes-schools-colleges-uk-](https://www.telegraph.co.uk/news/2020/03/12/ireland-closes-schools-colleges-uk-heads-delay-phase-coronavirus/)  
319 [heads-delay-phase-coronavirus/](https://www.telegraph.co.uk/news/2020/03/12/ireland-closes-schools-colleges-uk-heads-delay-phase-coronavirus/). Published March 12, 2020.
- 320 5. Education Week. Map: Coronavirus and School Closures. Education Week.  
321 [https://www.edweek.org/ew/section/multimedia/map-coronavirus-and-school-](https://www.edweek.org/ew/section/multimedia/map-coronavirus-and-school-closures.html#)  
322 [closures.html#](https://www.edweek.org/ew/section/multimedia/map-coronavirus-and-school-closures.html#). Accessed March 20, 2020.
- 323 6. Reuters. Factbox: Retailers close stores around globe to curb coronavirus spread.  
324 *Reuters Business News*. [https://www.reuters.com/article/us-health-coronavirus-](https://www.reuters.com/article/us-health-coronavirus-retail-factbox/factbox-retailers-close-stores-around-globe-to-curb-coronavirus-spread-idUSKBN2132J3)  
325 [retail-factbox/factbox-retailers-close-stores-around-globe-to-curb-coronavirus-](https://www.reuters.com/article/us-health-coronavirus-retail-factbox/factbox-retailers-close-stores-around-globe-to-curb-coronavirus-spread-idUSKBN2132J3)  
326 [spread-idUSKBN2132J3](https://www.reuters.com/article/us-health-coronavirus-retail-factbox/factbox-retailers-close-stores-around-globe-to-curb-coronavirus-spread-idUSKBN2132J3). Published March 16, 2020.
- 327 7. Testa J, Maheshwari S, Friedman V. Which Clothing and Beauty Stores Have  
328 Closed? *New York Times*. [https://www.nytimes.com/2020/03/18/style/coronavirus-](https://www.nytimes.com/2020/03/18/style/coronavirus-clothing-beauty-stores-closed.html)  
329 [clothing-beauty-stores-closed.html](https://www.nytimes.com/2020/03/18/style/coronavirus-clothing-beauty-stores-closed.html). Published March 20, 2020.
- 330 8. Hussain S, Chang A, Harris J. L.A. bars forced to close, restaurants go takeout-

- 331 only: "Some of these closures might be permanent." *Los Angeles Time*.  
332 [https://www.latimes.com/business/story/2020-03-15/coronavirus-close-los-](https://www.latimes.com/business/story/2020-03-15/coronavirus-close-los-angeles-restaurants)  
333 [angeles-restaurants](https://www.latimes.com/business/story/2020-03-15/coronavirus-close-los-angeles-restaurants). Published March 16, 2020.
- 334 9. Nossiter A, Minder R, Peltier E. Shutdowns Spread Across Europe as Spain and  
335 France Order Broad Restrictions. *New York Times*.  
336 <https://www.nytimes.com/2020/03/14/world/europe/france-coronavirus.html>.  
337 Published March 14, 2020.
- 338 10. Baker MG, Peckham TK, Seixas NS. Estimating the burden of United States  
339 workers exposed to infection or disease: a key factor in containing risk of COVID-  
340 19 infection. *medRxiv*. January 2020:2020.03.02.20030288.  
341 doi:10.1101/2020.03.02.20030288
- 342 11. Burgard SA, Brand JE, House JS. Perceived job insecurity and worker health in  
343 the United States. *Soc Sci Med*. 2009;69(5):777-785.
- 344 12. Meltzer H, Bebbington P, Brugha T, Jenkins R, McManus S, Stansfeld S. Job  
345 insecurity, socio-economic circumstances and depression. *Psychol Med*.  
346 2010;40(8):1401-1407.
- 347 13. De Cuyper N, De Witte H. Job insecurity in temporary versus permanent workers:  
348 Associations with attitudes, well-being, and behaviour. *Work Stress*.  
349 2007;21(1):65-84.
- 350 14. Burgard SA, Brand JE, House JS. Toward a better estimation of the effect of job  
351 loss on health. *J Health Soc Behav*. 2007;48(4):369-384.
- 352 15. Brand JE, Levy BR, Gallo WT. Effects of layoffs and plant closings on subsequent  
353 depression among older workers. *Res Aging*. 2008;30(6):701-721.
- 354 16. Classen TJ, Dunn RA. The effect of job loss and unemployment duration on  
355 suicide risk in the United States: A new look using mass-layoffs and  
356 unemployment duration. *Health Econ*. 2012;21(3):338-350.
- 357 17. Smed S, Tetens I, Lund TB, Holm L, Nielsen AL. The consequences of  
358 unemployment on diet composition and purchase behaviour: a longitudinal study

- 359 from Denmark. *Public Health Nutr.* 2018;21(3):580-592.
- 360 18. Hughes A, Kumari M. Unemployment, underweight, and obesity: Findings from  
361 Understanding Society (UKHLS). *Prev Med (Baltim).* 2017;97:19-25.
- 362 19. Michaud P-C, Crimmins EM, Hurd MD. The effect of job loss on health: Evidence  
363 from biomarkers. *Labour Econ.* 2016;41:194-203.
- 364 20. Lundin A, Falkstedt D, Lundberg I, Hemmingsson T. Unemployment and coronary  
365 heart disease among middle-aged men in Sweden: 39 243 men followed for 8  
366 years. *Occup Env Med.* 2014;71(3):183-188.
- 367 21. Brand JE. The effects of job displacement on job quality: Findings from the  
368 Wisconsin Longitudinal Study. *Res Soc Stratif Mobil.* 2006;24(3):275-298.
- 369 22. Podgursky M, Swaim P. Health insurance loss: the case of the displaced worker.  
370 *Mon Lab Rev.* 1987;110:30.
- 371 23. Casselman B, Cohen P, Hsu T. 'It's a Wreck': 3.3 Million File Unemployment  
372 Claims as Economy Comes Apart. *New York Times*.  
373 [https://www.nytimes.com/2020/03/26/business/economy/coronavirus-](https://www.nytimes.com/2020/03/26/business/economy/coronavirus-unemployment-claims.html)  
374 [unemployment-claims.html](https://www.nytimes.com/2020/03/26/business/economy/coronavirus-unemployment-claims.html). Published March 26, 2020.
- 375 24. Doubleday A, Baker MG, Lavoué J, Siemiatycki J, Seixas NS. Estimating the  
376 population prevalence of traditional and novel occupational exposures in Federal  
377 Region X. *Am J Ind Med.* 2019. doi:10.1002/ajim.22931
- 378 25. U.S. Bureau of Labor Statistics. Occupational Employment Statistics.  
379 <https://www.bls.gov/oes/home.htm>. Accessed February 25, 2020.
- 380 26. U.S. Bureau of Labor Statistics. 2010 SOC User Guide.  
381 [https://www.bls.gov/soc/soc\\_2010\\_user\\_guide.pdf](https://www.bls.gov/soc/soc_2010_user_guide.pdf). Published 2010. Accessed  
382 February 25, 2020.
- 383 27. U.S. Bureau of Labor Statistics. O\*NET Questionnaire.  
384 <https://www.onetcenter.org/questionnaires.html>. Published 2018. Accessed  
385 February 25, 2020.

- 386 28. O\*NET Resource Center. O\*NET Occupational Summary Update.  
387 <https://www.onetcenter.org/dataUpdates.html>. Published 2018. Accessed  
388 February 25, 2020.
- 389 29. U.S. Department of Labor. O\*NET Data Collection Program.  
390 [https://www.onetcenter.org/sl\\_files/omb2011/Supporting\\_StatementA.pdf](https://www.onetcenter.org/sl_files/omb2011/Supporting_StatementA.pdf).  
391 Published 2012. Accessed February 25, 2020.
- 392 30. US Department of Homeland Security. Identifying critical infrastructure during  
393 COVID-19. <https://www.cisa.gov/identifying-critical-infrastructure-during-covid-19>.  
394 Accessed March 24, 2020.
- 395 31. U.S. Bureau of Labor Statistics. National Compensation Survey.  
396 <https://www.bls.gov/ncs/>. Accessed March 20, 2020.
- 397 32. U.S. Bureau of Labor Statistics. American Time Use Survey.  
398 <https://www.bls.gov/tus/>. Accessed March 20, 2020.
- 399 33. Bureau USC. American Community Survey. [https://www.census.gov/programs-](https://www.census.gov/programs-surveys/acs)  
400 [surveys/acs](https://www.census.gov/programs-surveys/acs). Accessed March 20, 2020.
- 401 34. Benach J, Vives A, Amable M, Vanroelen C, Tarafa G, Muntaner C. Precarious  
402 employment: understanding an emerging social determinant of health. *Annu Rev*  
403 *Public Health*. 2014;35.
- 404 35. Cifuentes M, Boyer J, Lombardi DA, Punnett L. Use of O\*NET as a job exposure  
405 matrix: A literature review. *Am J Ind Med*. 2010;53(9).

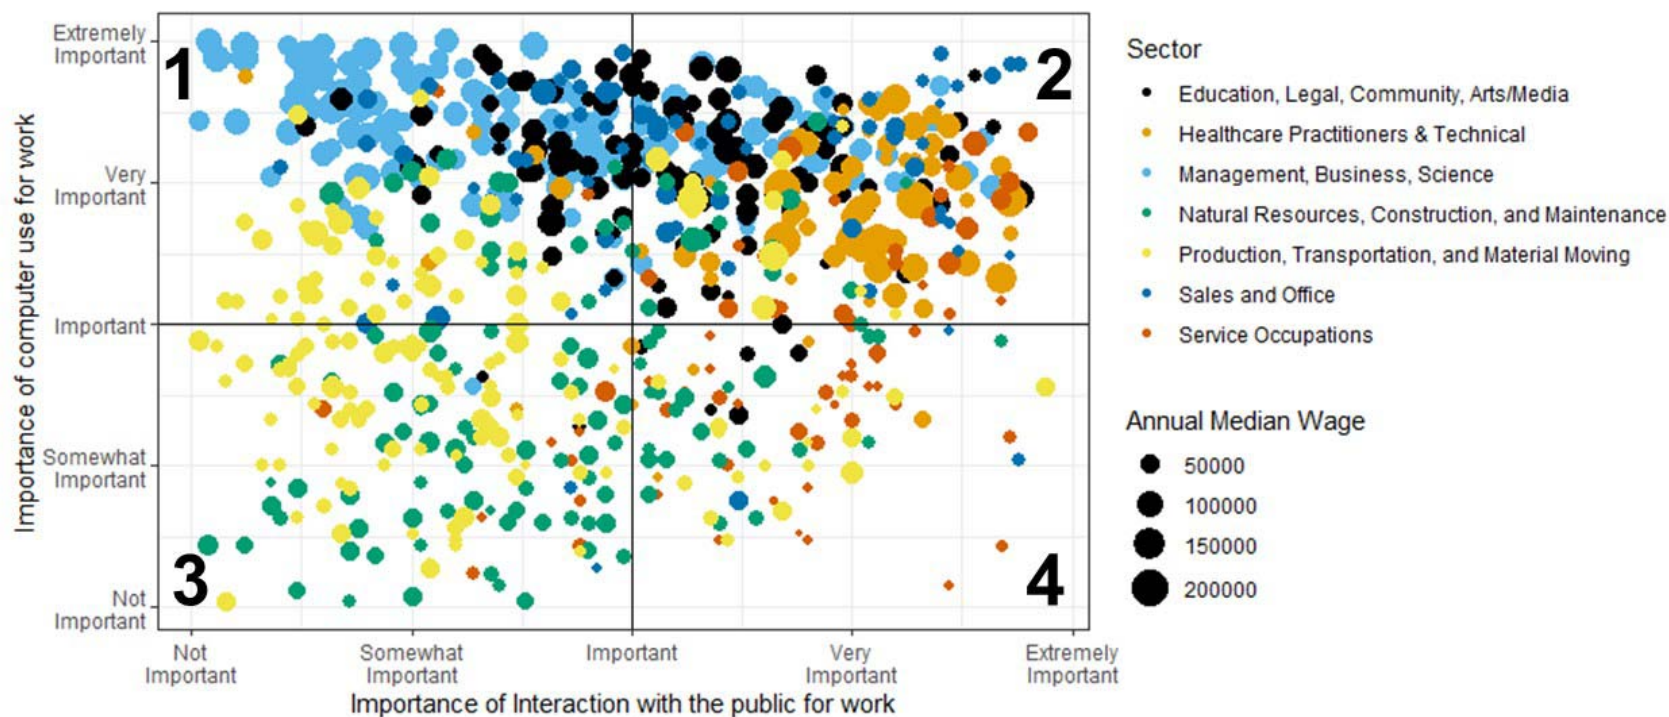

407

408

409 **Figure 1:** Who can work from home? Workers in quadrant 1 are workers that are likely able to work from home, whereas  
 410 those in quadrants 2, 3, and 4 likely would not be able to work from home. Each point on the graph is weighted by the  
 411 annual median wage for the occupation, and color-coded by broad occupational sector.

412



413 **Table 1:** Distribution of median annual wages by quadrant, as shown in Figure 1

| Quadrant                      | Average Median Annual Wage |               |                        | % workers   | # workers          | p*                  |
|-------------------------------|----------------------------|---------------|------------------------|-------------|--------------------|---------------------|
|                               | Mean (\$)                  | Median (\$)   | IQR (\$)               |             |                    |                     |
| 1. High computer, low public  | 66,196                     | 62,710        | (44,380—83,555         | 24.6%       | 35,583,140         | --                  |
| 2. High computer, high public | 62,596                     | 56,950        | (39,818—74,128)        | 36.4%       | 52,744,670         | 0.017               |
| 3. Low computer, low public   | 40,068                     | 38,190        | (30,170—47,170)        | 20.1%       | 29,032,800         | <0.0001             |
| 4. Low computer, high public  | 34,258                     | 32,040        | (24,580—40,060)        | 18.9%       | 27,370,610         | <0.0001             |
| <b>All</b>                    | <b>55,489</b>              | <b>48,650</b> | <b>(35,595—68,215)</b> | <b>100%</b> | <b>144,731,220</b> | <b>&lt;0.0001**</b> |

414 \*Wilcoxon Rank-Sum test of median annual wages compared to quadrant 1

415 \*\*Kruskal-Wallis analysis of variance test of median annual wages compared between all 4 quadrants

416

417

418

419 **Table 2:** Employment and annual average median wage by 2-digit SOC, and percentage of total SOC distribute across all four  
 420 quadrants.

|                 |                                              | % SOC distributed in each Quadrant |                    |               |              |              |              |
|-----------------|----------------------------------------------|------------------------------------|--------------------|---------------|--------------|--------------|--------------|
| 2-digit SOC     |                                              | Median Annual Wage                 | Total in SOC       | 1             | 2            | 3            | 4            |
| 11              | Management                                   | \$104,240                          | 7,616,650          | 32.0%         | <b>68.0%</b> | --           | --           |
| 13              | Business & Financial Operations              | \$68,350                           | 7,721,300          | <b>72.7%</b>  | 27.3%        | <0.1%        | --           |
| 15              | Computer & Mathematical                      | \$86,340                           | 4,384,300          | <b>100.0%</b> | --           | --           | --           |
| 17              | Architecture & Engineering                   | \$80,170                           | 2,556,220          | <b>90.8%</b>  | 9.2%         | --           | --           |
| 19              | Life, Physical, & Social Science             | \$66,070                           | 1,171,910          | <b>63.6%</b>  | 36.3%        | --           | --           |
| 21              | Community & Social Services                  | \$44,960                           | 2,171,820          | --            | <b>97.8%</b> | --           | 2.2%         |
| 23              | Legal                                        | \$80,810                           | 1,127,900          | 9.9%          | <b>90.1%</b> | --           | --           |
| 25              | Education, Training, & Library               | \$49,700                           | 8,779,780          | 26.7%         | <b>50.6%</b> | 20.0%        | 2.8%         |
| 27              | Arts, Design, Entertainment, Sports, & Media | \$49,290                           | 1,951,170          | 43.7%         | <b>47.0%</b> | --           | 9.3%         |
| 29              | Healthcare Practitioners & Technical         | \$66,440                           | 8,646,730          | 7.7%          | <b>90.5%</b> | --           | 1.9%         |
| 31              | Healthcare Support                           | \$29,740                           | 4,117,450          | 1.3%          | <b>38.7%</b> | 36.6%        | 23.3%        |
| 33              | Protective Service                           | \$40,640                           | 3,437,410          | 4.4%          | <b>54.8%</b> | --           | 40.8%        |
| 35              | Food Preparation & Serving Related           | \$23,070                           | 13,374,620         | --            | 8.2%         | 10.4%        | <b>81.4%</b> |
| 37              | Building & Grounds Cleaning & Maintenance    | \$26,840                           | 4,421,980          | --            | 2.3%         | <b>70.4%</b> | 27.3%        |
| 39              | Personal Care & Service                      | \$24,420                           | 5,451,330          | --            | 22.6%        | <b>40.8%</b> | 36.6%        |
| 41              | Sales & Related                              | \$28,180                           | 14,542,290         | 12.5%         | <b>61.9%</b> | 0.0%         | 25.6%        |
| 43              | Office & Administrative Support              | \$35,760                           | 21,828,990         | 45.6%         | <b>52.0%</b> | 0.8%         | 1.6%         |
| 45              | Farming, Fishing, & Forestry                 | \$25,380                           | 480,130            | --            | 5.0%         | <b>86.7%</b> | 7.9%         |
| 47              | Construction & Extraction                    | \$46,010                           | 5,962,640          | --            | 2.2%         | <b>76.0%</b> | 21.9%        |
| 49              | Installation, Maintenance, & Repair          | \$45,540                           | 5,628,880          | 30.7%         | 23.3%        | <b>38.9%</b> | 7.0%         |
| 51              | Production                                   | \$35,070                           | 9,115,530          | 21.1%         | 1.7%         | <b>74.2%</b> | 3.0%         |
| 53              | Transportation & Material Moving             | \$32,730                           | 10,244,260         | 4.8%          | 5.9%         | <b>48.4%</b> | 41.1%        |
| <b>All SOCs</b> |                                              | <b>\$38,640</b>                    | <b>144,733,290</b> | <b>24.6%</b>  | <b>36.4%</b> | <b>20.1%</b> | <b>18.9%</b> |

**Bold** denotes the quadrant where the majority of workers in each 2-digit SOC fall.

421

422
